# Supplementary material for: Hexameric Aggregation Nucleation Core Sequences and Diversity of Pathogenic Tau Strains
Source: MDPI journal article supplement (doi:10.3390/pathogens11121559), 2022-12-19
Supplement: s1 [file s1]

## Supporting Information (SI)

### Hexameric Aggregation Nucleation Core Sequences and Diversity of Pathogenic Tau Strains

Ling Wu <sup>1,2</sup>, Sidharth S. Madhavan <sup>3,4</sup>, Christopher Tan <sup>3</sup> and Bin Xu <sup>1,2,3,4,\*</sup>

<sup>1</sup> Biomanufacturing Research Institute & Technology Enterprise (BRITE), Department of Pharmaceutical Sciences, North Carolina Central University, Durham, NC 27707, USA

<sup>2</sup> Affiliated Member, Duke/UNC Alzheimer's Disease Research Center, Durham, NC 27710, USA

<sup>3</sup> Departments of Biochemistry, Virginia Polytechnic Institute and State University, Blacksburg, VA 24061, USA

<sup>4</sup> School of Neuroscience, Virginia Polytechnic Institute and State University, Blacksburg, VA 24061, USA

**Table S1.** Oligo Primer Sequence Information for Truncation Mutagenesis. PCR annealing temperatures are calculated by IDT OligoAnalyzer Tool based on primer pair sequences and experimental reaction conditions.

| Primers |         |                                                       | Annealing Temp (°C) |
|---------|---------|-------------------------------------------------------|---------------------|
| N1      | Forward | CATTCATATGGAATCTCCCCTGCAG                             | 65.0                |
|         | Reverse | TTAACTCGAGTCAATGATGATGATGATGATGCAAACCCTGCTTGGCCAGG    |                     |
| N2      | Forward | CATTCATATGGTGACAGCACCCCTTA                            | 64.7                |
|         | Reverse | TTAACTCGAGTCAATGATGATGATGATGATGCAAACCCTGCTTGGCCAGG    |                     |
| N3      | Forward | CATTCATATGGAAGAAGCAGGCATT                             | 63.7                |
|         | Reverse | TTAACTCGAGTCAATGATGATGATGATGATGCAAACCCTGCTTGGCCAGG    |                     |
| N4      | Forward | AATTCATATGCAGACAGCCCCCGTGCCTAT                        | 72.0                |
|         | Reverse | TTAACTCGAGTCAATGATGATGATGATGATGCAAACCCTGCTTGGCCAGG    |                     |
| N5      | Forward | TTAACATATGGTGACAGATAATTAATAAG                         | 58.6                |
|         | Reverse | TTAACTCGAGTCAATGATGATGATGATGATGCAAACCCTGCTTGGCCAGG    |                     |
| N6      | Forward | TTAACATATGGTGCAAATAGTCTAC                             | 59.1                |
|         | Reverse | TTAACTCGAGTCAATGATGATGATGATGATGCAAACCCTGCTTGGCCAGG    |                     |
| N7      | Forward | TTAACATATGGTGGAAGTAAAATC                              | 57.1                |
|         | Reverse | TTAACTCGAGTCAATGATGATGATGATGATGCAAACCCTGCTTGGCCAGG    |                     |
| N8      | Forward | TTAACATATGAAAAAGATTGAAAC                              | 54.5                |
|         | Reverse | TTAACTCGAGTCAATGATGATGATGATGATGCAAACCCTGCTTGGCCAGG    |                     |
| C1      | Forward | CATTCATATGGCTGAGCCCCGCCAG                             | 71.0                |
|         | Reverse | TTAACTCGAGTCAATGATGATGATGATGATGATTTCCTCCGCCAGGGACGT   |                     |
| C2      | Forward | CATTCATATGGCTGAGCCCCGCCAG                             | 71.0                |
|         | Reverse | TTAACTCGAGTCAATGATGATGATGATGATGCTGGCCACCTCCTGGTTTAT   |                     |
| C3      | Forward | CATTCATATGGCTGAGCCCCGCCAG                             | 71.0                |
|         | Reverse | TTAACTCGAGTCAATGATGATGATGATGATGACTGCCGCCTCCCGGGACGT   |                     |
| C4      | Forward | CATTCATATGGCTGAGCCCCGCCAG                             | 71.0                |
|         | Reverse | TTAACTCGAGTCAATGATGATGATGATGATGCTTCCCGCCTCCCGGCTGGT   |                     |
| C5      | Forward | CATTCATATGGCTGAGCCCCGCCAG                             | 71.0                |
|         | Reverse | TTAACTCGAGTCAATGATGATGATGATGATGCAGGCGGCTCTTGGCGGAAG   |                     |
| C6      | Forward | CATTCATATGGCTGAGCCCCGCCAG                             | 71.0                |
|         | Reverse | TTAACTCGAGTCAATGATGATGATGATGATGCTTATTAATTATCTGCACCTTC |                     |
| C7      | Forward | CATTCATATGGCTGAGCCCCGCCAG                             | 71.0                |
|         | Reverse | TTAACTCGAGTCAATGATGATGATGATGATGTTTGTAGACTATTGACCTTC   |                     |
| C8      | Forward | CATTCATATGGCTGAGCCCCGCCAG                             | 71.0                |
|         | Reverse | TTAACTCGAGTCAATGATGATGATGATGATGTATCTGCACCTTCCCGCCTC   |                     |

**Table S2.** Atomic interactions involving residues VYK of VQIVYK (PHF6) or INK of VQIINK (PHF6\*) hexameric core sequences in diverse tau strains. Corresponding intra-molecular interactions are highlighted by arrows in Figure 6. Inter-atomic distances are measured using Pymol Molecular Display Software.

| Protein                | Residue 1      | Residue 2 | Distance (Å) | Type of bonding | Protein          | Residue 1        | Residue 2 | Distance (Å)  | Type of bonding |             |
|------------------------|----------------|-----------|--------------|-----------------|------------------|------------------|-----------|---------------|-----------------|-------------|
| Tau (Alzheimer's fold) |                |           |              |                 | Tau (PSP fold)   |                  |           |               |                 |             |
| PDB access code:       |                |           |              |                 | PDB access code: |                  |           |               |                 |             |
| 5O3L                   | Y310/CB        | L376/CD2  | 4.8          | Hydrophobic     | 7P65             | Y310/CB          | P301/CG   | 4.7           | Hydrophobic     |             |
|                        | Y310/CG        | L376/CD2  | 4.5          | Hydrophobic     | Continued        | Y310/CG          | P301/CB   | 4.3           | Hydrophobic     |             |
|                        | Y310/CD1       | L376/CD2  | 4.0          | Hydrophobic     |                  | Y310/CG          | P301/CG   | 4.1           | Hydrophobic     |             |
|                        | Y310/CD1       | L376/CG   | 5.0          | Hydrophobic     |                  | Y310/CD1         | P301/CG   | 4.5           | Hydrophobic     |             |
|                        | Y310/CD1       | L376/CB   | 4.9          | Hydrophobic     |                  | Y310/CD2         | P301/CA   | 4.9           | Hydrophobic     |             |
|                        | Y310/CE1       | L376/CB   | 4.6          | Hydrophobic     |                  | Y310/CD2         | P301/CB   | 3.6           | Hydrophobic     |             |
|                        | Y310/CZ        | H374/CG   | 4.9          | Hydrophobic     |                  | Y310/CD2         | P301/CG   | 3.8           | Hydrophobic     |             |
|                        | Y310/CZ        | H374/CD2  | 4.7          | Hydrophobic     |                  | Y310/CD2         | P301/CD   | 4.6           | Hydrophobic     |             |
|                        | Y310/CZ        | H374/CB   | 4.7          | Hydrophobic     |                  | Y310/CE1         | H299/CB   | 4.3           | Hydrophobic     |             |
| Y310/CE1               |                |           |              | Y310/CE1        |                  | H299/CG          | 4.3       | Hydrophobic   |                 |             |
| Tau (CTE fold)         |                |           |              |                 |                  |                  |           |               |                 |             |
| PDB access code:       |                |           |              |                 |                  |                  |           |               |                 |             |
| 6NWP                   | Y310/CB        | L376/CD2  | 3.8          | Hydrophobic     | Y310/CE1         | H299/CE1         | 4.6       | Hydrophobic   |                 |             |
|                        | Y310/CB        | L376/CG   | 5.0          | Hydrophobic     | Y310/CE1         | P301/CG          | 4.7       | Hydrophobic   |                 |             |
|                        | Y310/CG        | L376/CB   | 4.7          | Hydrophobic     | Y310/CE1         | P301/CD          | 5.0       | Hydrophobic   |                 |             |
|                        | Y310/CG        | L376/CG   | 4.9          | Hydrophobic     | Y310/CE2         | P301/CA          | 4.9       | Hydrophobic   |                 |             |
|                        | Y310/CG        | L376/CD2  | 4.1          | Hydrophobic     | Y310/CE2         | P301/CB          | 3.9       | Hydrophobic   |                 |             |
|                        | Y310/CD1       | L376/CB   | 4.2          | Hydrophobic     | Y310/CE2         | P301/CG          | 3.9       | Hydrophobic   |                 |             |
|                        | Y310/CD1       | L376/CG   | 4.6          | Hydrophobic     | Y310/CE2         | P301/CD          | 4.3       | Hydrophobic   |                 |             |
|                        | Y310/CD1       | L376/CD1  | 4.8          | Hydrophobic     | Y310/CZ          | H299/CA          | 4.7       | Hydrophobic   |                 |             |
|                        | Y310/CD1       | L376/CD2  | 4.1          | Hydrophobic     | Y310/CZ          | H299/CB          | 4.0       | Hydrophobic   |                 |             |
|                        | Y310/CD2       | L376/CD2  | 4.9          | Hydrophobic     | Y310/CZ          | H299/CG          | 4.2       | Hydrophobic   |                 |             |
|                        | Y310/CD2       | H374/CE1  | 4.9          | Hydrophobic     | Y310/CZ          | H299/CE1         | 4.6       | Hydrophobic   |                 |             |
|                        | Y310/CE1       | L376/CA   | 4.9          | Hydrophobic     | Y310/CZ          | P301/CB          | 4.7       | Hydrophobic   |                 |             |
|                        | Y310/CE1       | L376/CB   | 4.3          | Hydrophobic     | Y310/CZ          | P301/CG          | 4.4       | Hydrophobic   |                 |             |
|                        | Y310/CE1       | L376/CG   | 5.0          | Hydrophobic     | Y310/CZ          | P301/CD          | 4.5       | Hydrophobic   |                 |             |
|                        | Y310/CE2       | H374/CB   | 4.2          | Hydrophobic     | Y310/OH          | H299/ND1         | 2.5       | Hydrogen bond |                 |             |
|                        | Y310/CE2       | H374/CG   | 4.3          | Hydrophobic     | K311/CE          | D348/CG          | 3.8       | Hydrophobic   |                 |             |
|                        | Y310/CE2       | H374/CE1  | 4.6          | Hydrophobic     | K311/NZ          | D348/OD2         | 2.9       | Hydrogen bond |                 |             |
|                        | Y310/CZ        | H374/CA   | 4.7          | Hydrophobic     | Tau (GGT fold)   |                  |           |               |                 |             |
|                        |                |           |              |                 | PDB access code: |                  |           |               |                 |             |
|                        |                | Y310/CZ   | H374/CB      | 4.3             | Hydrophobic      | 7P66             | V309/CB   | N296/CA       | 5.0             | Hydrophobic |
|                        |                | Y310/CZ   | H374/CG      | 4.5             | Hydrophobic      |                  | V309/CB   | N296/CB       | 4.3             | Hydrophobic |
|                        |                | Y310/CZ   | H374/CE1     | 4.8             | Hydrophobic      |                  | V309/CB   | N296/CG       | 4.5             | Hydrophobic |
|                        |                | Y310/CZ   | L376/CB      | 4.8             | Hydrophobic      |                  | V309/CG1  | N296/CA       | 4.9             | Hydrophobic |
|                        | Y310/OH        | H374/ND1  | 3.0          | Hydrogen bond   |                  | V309/CG1         | N296/CB   | 4.2           | Hydrophobic     |             |
| Tau (Pick's fold)      |                |           |              |                 |                  | V309/CG1         | N296/CG   | 4.1           | Hydrophobic     |             |
| PDB access code:       |                |           |              |                 |                  |                  |           |               |                 |             |
| 6GX5                   | Y310/CD2       | V337/CG2  | 4.4          | Hydrophobic     |                  | V309/CG2         | N296/CA   | 4.3           | Hydrophobic     |             |
|                        | Y310/CE2       | V337/CG2  | 4.8          | Hydrophobic     |                  | V309/CG2         | N296/CB   | 3.9           | Hydrophobic     |             |
| Tau (CBD fold)         |                |           |              |                 |                  | V309/CG2         | N296/CG   | 4.6           | Hydrophobic     |             |
| PDB access code:       |                |           |              |                 |                  |                  |           |               |                 |             |
| 6TJO                   | V309/CB        | I297/CG1  | 4.7          | Hydrophobic     |                  | V309/CG2         | I297/CG1  | 3.9           | Hydrophobic     |             |
|                        | V309/CB        | I297/CG2  | 4.9          | Hydrophobic     |                  | V309/CG2         | I297/CD1  | 4.2           | Hydrophobic     |             |
|                        | V309/CG1       | I297/CG1  | 4.4          | Hydrophobic     |                  | Y310/CD1         | I354/CG2  | 5.0           | Hydrophobic     |             |
|                        | V309/CG1       | I297/CD1  | 4.7          | Hydrophobic     |                  | Y310/CD1         | I354/CD1  | 5.0           | Hydrophobic     |             |
|                        | V309/CG2       | I297/CB   | 4.8          | Hydrophobic     |                  | Y310/CE1         | D348/CG   | 5.0           | Hydrophobic     |             |
|                        | V309/CG2       | I297/CG1  | 4.2          | Hydrophobic     |                  | Y310/CE1         | I354/CD1  | 4.7           | Hydrophobic     |             |
|                        | V309/CG2       | I297/CG2  | 3.9          | Hydrophobic     |                  | Y310/CE2         | D348/CB   | 4.6           | Hydrophobic     |             |
|                        | Y310/CD1       | V337/CG2  | 4.7          | Hydrophobic     |                  | Y310/CE2         | D348/CG   | 4.0           | Hydrophobic     |             |
|                        | K311/CD        | D295/CG   | 4.5          | Hydrophobic     |                  | Y310/CZ          | D348/CG   | 3.9           | Hydrophobic     |             |
|                        | K311/CD        | I297/CD1  | 5.0          | Hydrophobic     |                  | Y310/OH          | D348/OD1  | 2.8           | Hydrogen bond   |             |
|                        | K311/CE        | D295/CG   | 4.1          | Hydrophobic     |                  | Y310/OH          | D348/OD2  | 3.1           | Hydrogen bond   |             |
|                        | K311/CE        | I297/CD1  | 4.6          | Hydrophobic     |                  | K311/CE          | D348/CB   | 4.8           | Hydrophobic     |             |
|                        | N279/CB        | L376/CD1  | 4.4          | Hydrophobic     | Tau (GPT fold)   |                  |           |               |                 |             |
|                        | Tau (AGD fold) |           |              |                 |                  | PDB access code: |           |               |                 |             |
| 7P6D                   |                |           |              |                 | 7P6A             | V309/CB          | V350/CG1  | 4.9           | Hydrophobic     |             |
| V309/CB                | V309/CB        | I297/CG1  | 4.4          | Hydrophobic     |                  | V309/CG1         | V350/CB   | 4.7           | Hydrophobic     |             |
|                        | V309/CG1       | I297/CD1  | 4.3          | Hydrophobic     |                  | V309/CG1         | V350/CG1  | 4.3           | Hydrophobic     |             |
|                        | V309/CG2       | I297/CB   | 4.5          | Hydrophobic     |                  | V309/CG1         | V350/CG2  | 5.0           | Hydrophobic     |             |
|                        | V309/CG2       | I297/CG2  | 4.5          | Hydrophobic     |                  | V309/CG2         | V350/CG1  | 4.2           | Hydrophobic     |             |
|                        | V309/CG2       | I297/CD1  | 3.8          | Hydrophobic     |                  | Y310/CG          | I297/CD1  | 4.9           | Hydrophobic     |             |
|                        | Y310/CD1       | V337/CG2  | 4.3          | Hydrophobic     |                  | Y310/CD2         | I297/CG1  | 4.4           | Hydrophobic     |             |
|                        | Y310/CE1       | V337/CG2  | 4.4          | Hydrophobic     |                  | Y310/CD2         | I297/CD1  | 3.6           | Hydrophobic     |             |
|                        | K311/CD        | D295/CG   | 4.5          | Hydrophobic     |                  | Y310/CE2         | D295/CB   | 5.0           | Hydrophobic     |             |
|                        | K311/CE        | D295/CG   | 4.2          | Hydrophobic     |                  | Y310/CE2         | I297/CB   | 4.9           | Hydrophobic     |             |
|                        | K311/NZ        | D295/OD2  | 2.9          | Hydrogen bond   |                  | Y310/CE2         | I297/CG1  | 4.0           | Hydrophobic     |             |
|                        | K311/NZ        | D295/OD1  | 3.0          | Hydrogen bond   |                  | Y310/CE2         | I297/CD1  | 3.7           | Hydrophobic     |             |
|                        |                |           |              |                 |                  | Y310/CZ          | D295/CB   | 4.4           | Hydrophobic     |             |
| Tau (PSP fold)         |                |           |              |                 |                  |                  |           |               |                 |             |
| PDB access code:       |                |           |              |                 |                  |                  |           |               |                 |             |
| 7P65                   | V309/CB        | D348/CG   | 5.0          | Hydrophobic     | Y310/CZ          | I297/CD1         | 5.0       | Hydrophobic   |                 |             |
|                        | V309/CB        | V350/CG2  | 4.8          | Hydrophobic     | K311/CD          | D348/CB          | 5.0       | Hydrophobic   |                 |             |

|          |          |     |             |         |          |     |               |
|----------|----------|-----|-------------|---------|----------|-----|---------------|
| V309/CG1 | D348/CB  | 4.9 | Hydrophobic | K311/CD | V350/CG2 | 4.5 | Hydrophobic   |
| V309/CG1 | D348/CG  | 4.0 | Hydrophobic | K311/CE | D348/CB  | 3.9 | Hydrophobic   |
| V309/CG2 | V350/CB  | 4.9 | Hydrophobic | K311/CE | D348/CG  | 4.0 | Hydrophobic   |
| V309/CG2 | V350/CG1 | 4.8 | Hydrophobic | K311/CE | V350/CG2 | 4.7 | Hydrophobic   |
| V309/CG2 | V350/CG2 | 3.8 | Hydrophobic | K311/NZ | D348/OD2 | 2.4 | Hydrogen bond |
| Y310/CB  | P301/CB  | 4.8 | Hydrophobic |         |          |     |               |

---
